# Supplementary material for: PD-L1 negatively regulates antifungal immunity by inhibiting neutrophil release from bone marrow
Source: Springer Nature journal article supplement (doi:10.1038/s41467-022-34722-7), 2022-11-11
Supplement: MOESM1 [file 41467_2022_34722_MOESM1_ESM.pdf]

## Supplemental Figures

Supplementary Figure 1

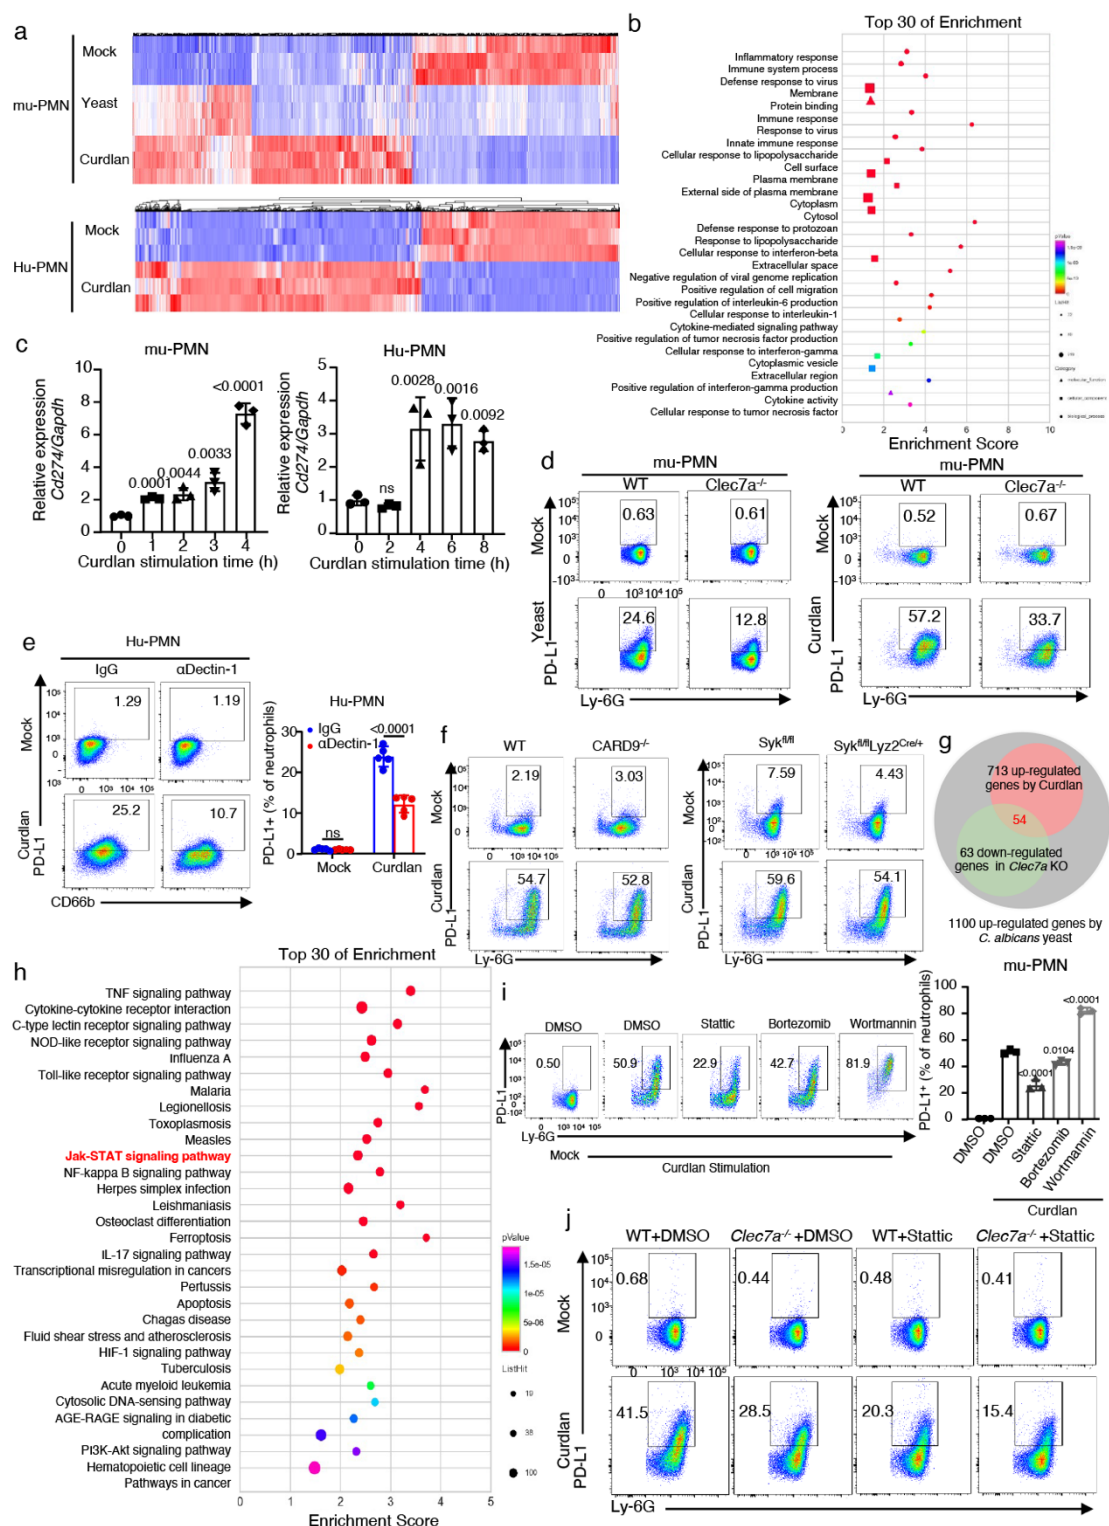

Supplementary Figure 1.  $\beta$ -glucans from *C. albicans* activate the Dectin-1/JAK2/STAT3 axis to initiate PD-L1 expression in neutrophils. (a) Heatmaps of

mu-PMNs and Hu-PMNs RNA-seq. **(b)** Gene Ontology (GO) analysis of 476 up-regulated genes in murine neutrophils and human neutrophils after stimulation with  $\beta$ -glucans or heat-inactivated *C. albicans* yeast as in Figure 1A. **(c)** qRT-PCR analysis of PD-L1 enrichment in mu-PMNs and Hu-PMNs after stimulation with curdlan (25 $\mu$ g/well for mu-PMNs and 50 $\mu$ g/well for Hu-PMNs) for the indicated time. **(d)** Flow cytometry analysis chart of PD-L1<sup>+</sup> Ly-6G<sup>+</sup> mu-PMNs in *Clec7a*<sup>-/-</sup> mouse after stimulation with yeast (MOI=1) or curdlan (25 $\mu$ g/well) for 12 hours, **related to Fig 1e**. **(e)** The percentage of PD-L1<sup>+</sup> CD66b<sup>+</sup> Hu-PMNs treated with anti-Dectin-1 ( $\alpha$ Dectin-1, 1 $\mu$ g/ml), which were then stimulated with curdlan (50 $\mu$ g/well) for 12 hours. **(f)** Flow cytometry analysis chart of PD-L1<sup>+</sup> Ly-6G<sup>+</sup> mu-PMNs in CARD9<sup>-/-</sup> or Syk<sup>fl/fl</sup>Lyz2<sup>Cre/+</sup> mouse after stimulation with curdlan(25 $\mu$ g/well) for 12 hours, **related to Fig 1f**. **(g)** Number of called peaks differentially regulated as indicated. **(h)** KEGG analysis of 54 co-upregulated genes in wild-type mu-PMNs and down-regulated in *Clec7a*<sup>-/-</sup> mu-PMNs, which were stimulated with curdlan(25 $\mu$ g/well) or heat-inactivated *C. albicans* yeast (MOI=0.1) for 4 hours. **(i)** The percentage of PD-L1<sup>+</sup> Ly-6G<sup>+</sup> mu-PMNs stimulated with curdlan(25 $\mu$ g/well) combined with inhibitors Stattic(1 $\mu$ M), Bortezomib(5nM) or Wortmannin(0.5 $\mu$ M) for 12 hours. **(j)** Flow cytometry analysis chart of PD-L1<sup>+</sup> Ly-6G<sup>+</sup> mu-PMNs in wild-type and *Clec7a*<sup>-/-</sup> mouse stimulated with curdlan(25 $\mu$ g/well) combined with inhibitor Stattic (1 $\mu$ M) for 12 hours, **related to Fig 1i**. Data were presented as mean  $\pm$  SD, n=3(**c**, **i**), n=5(**e**) biological independent samples. Data were analyzed by unpaired two-sided Student's t test in **e** and one-way ANOVA adjusted for multiple comparisons in **c**, **i**. Source data are provided as a Source Data file.

Supplementary Figure 2

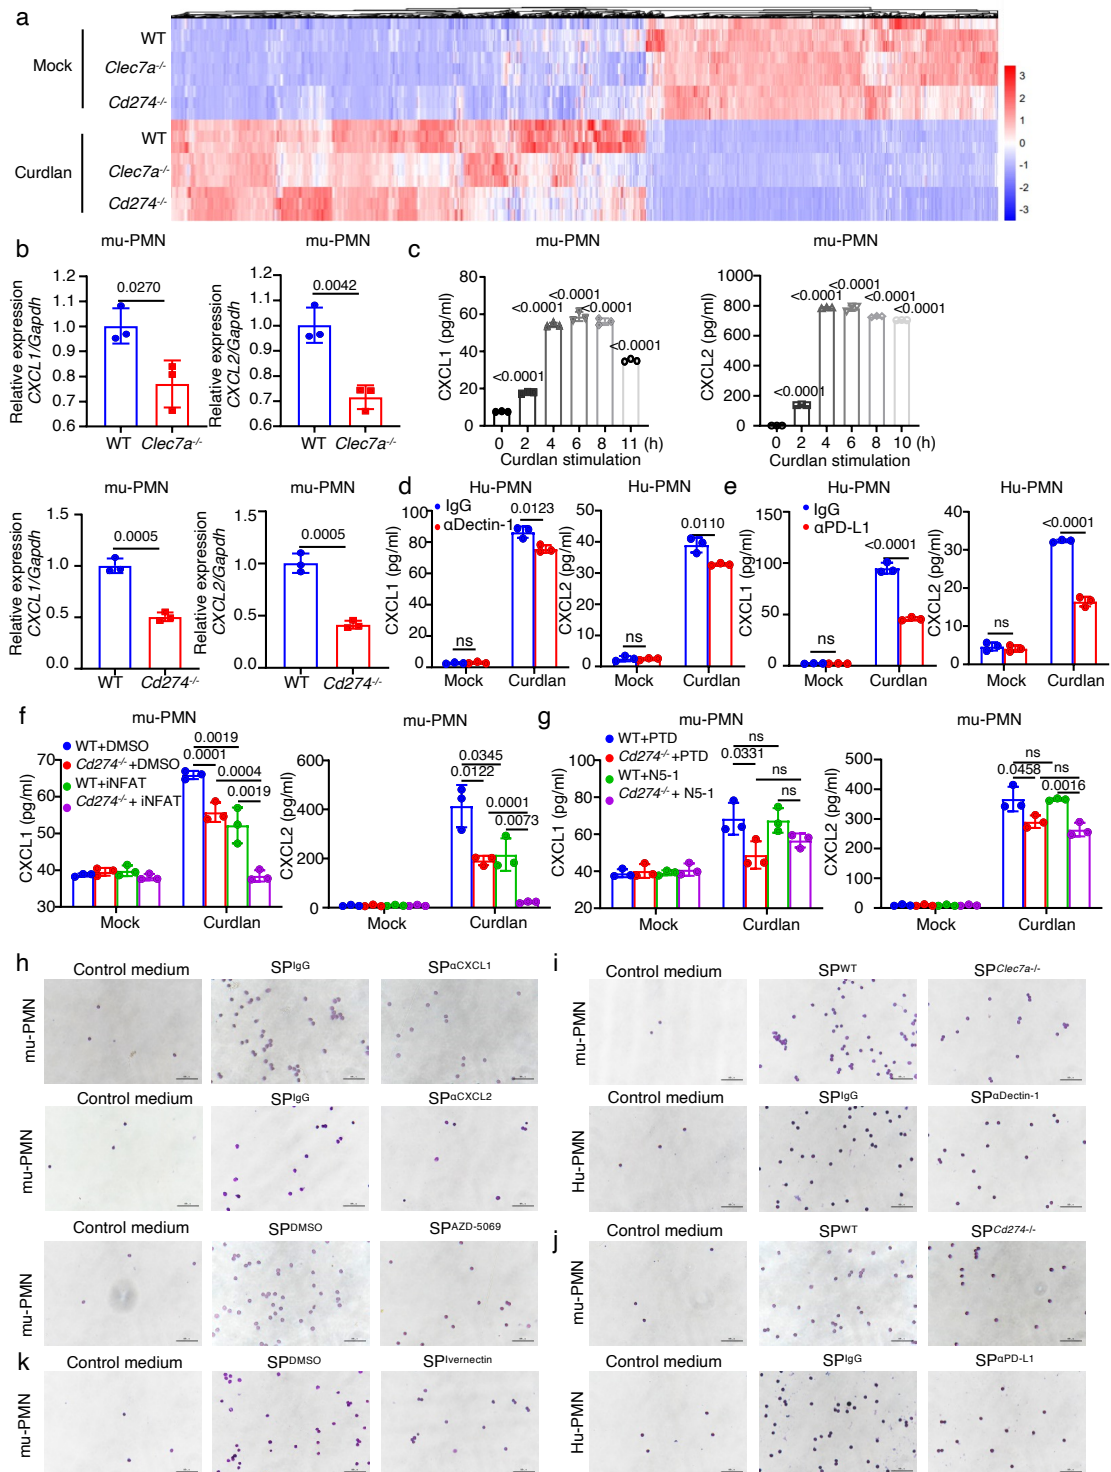

**Supplementary Figure 2. PD-L1 governs the mobilization of neutrophils through regulating their autocrine secretion of CXCL1/2.** (a) Heatmaps of mu-PMNs RNA-seq. (b) qRT-PCR analysis of CXCL1 and CXCL2 enrichment in *Clec7a*<sup>-/-</sup> and *Cd274*<sup>-/-</sup> mu-PMNs, which were stimulated with curdlan(25μg/well) for 4 hours. (c) ELISA quantification of supernatant CXCL1 and CXCL2 in mu-PMN after stimulation with

curdlan(25µg/well) for the indicated time. **(d-e)** ELISA quantification of supernatant CXCL1 and CXCL2 in Hu-PMNs after treatment with anti-Dectin-1 ( $\alpha$ Dectin-1, 1µg/ml) or anti-PD-L1 ( $\alpha$ PD-L1, 10µg/ml), which were stimulated with curdlan (50µg/well) for 4 hours. **(f-g)** ELISA quantification of supernatant CXCL1 and CXCL2 in mu-PMN stimulated with curdlan (25µg/well) combined with inhibitor iNFAT (5µM) or N5-1 (5mM) for 4 hours. **(h-k)** Representative images of crystal violet staining of trans-well assay, **related to Fig 2l-o**. Scale bar=50 µm. Data were presented as mean  $\pm$  SD, n=3**(b-g)** biological independent samples. Data were analyzed by unpaired two-sided Student's t test in **b, d-e** and one-way ANOVA adjusted for multiple comparisons in **c, f-g**. Source data are provided as a Source Data file.

Supplementary Figure 3

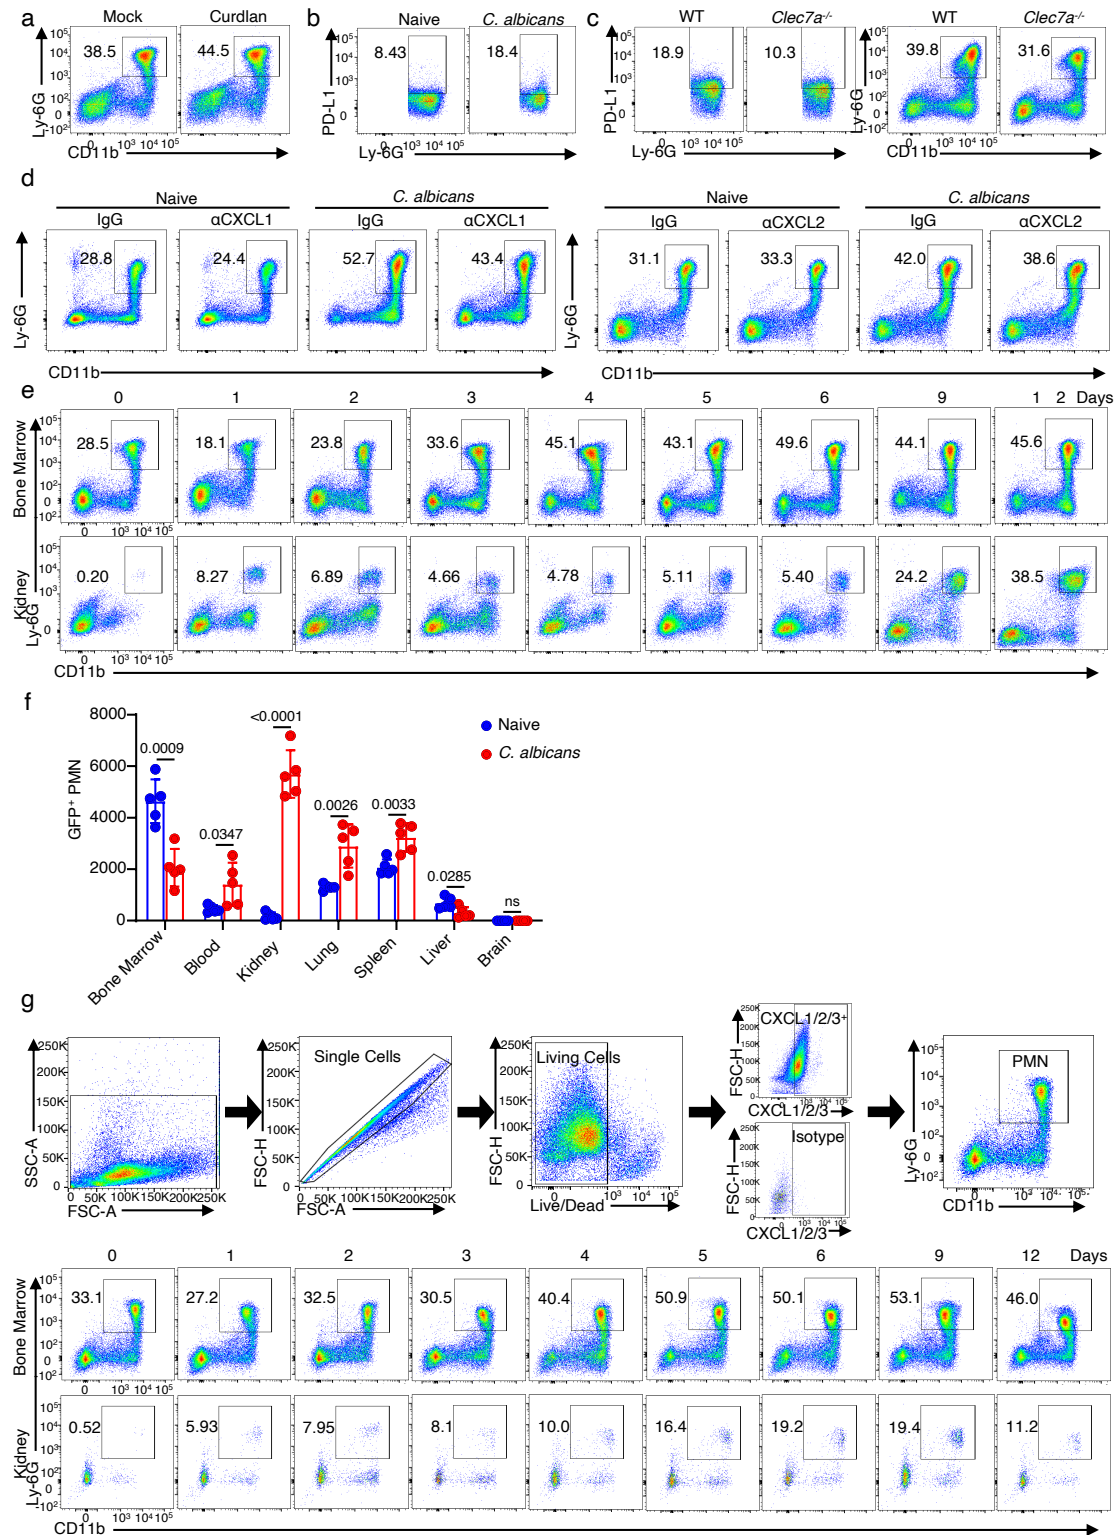

**Supplementary Figure 3. Bloodstream infection with *C. albicans* induces PD-L1 expression in neutrophils through Dectin-1 and subsequent neutrophil accumulation in the bone marrow. (a)** Flow cytometry analysis chart of neutrophils in the bone marrow of wild-type mice, which were microinjected with curdlan (0.1 $\mu$ g)

into the tibia for 2 days, **related to Fig 3c.** **(b)** Flow cytometry analysis chart of PD-L1<sup>+</sup>Ly-6G<sup>+</sup> neutrophils in the bone marrow of wild-type mice, which were intravenously infected with  $2 \times 10^5$  CFUs of *C. albicans* strain SC5314 for 4 days, **related to Fig 3e.** **(c)** Flow cytometry analysis chart of PD-L1<sup>+</sup>Ly-6G<sup>+</sup> (Left) Ly-6G<sup>+</sup> neutrophils (Right) in the bone marrow of wild-type and *Clec7a*<sup>-/-</sup> mice, which were intravenously infected with  $2 \times 10^5$  CFUs of *C. albicans* strain SC5314 for 4 days, **related to Fig 3f.** **(d)** Flow cytometry analysis chart of neutrophils in bone marrow of mock and *C. albicans* ( $2 \times 10^5$  CFU/mouse)-infected wild-type mice on day 4, which were pretreated with IgG (Control, 5 or 40ng/mouse), anti-CXCL1 (5ng/mouse) and anti-CXCL2 (40ng/mouse) into tibia for 24 hours before scarification, **related to Fig 3h.** **(e)** Flow cytometry analysis chart of neutrophils in the bone marrow and kidney of wild-type mice after intravenous infection with *C. albicans* SC5314 ( $2 \times 10^5$  CFU/mouse) for indicated days, **related to Fig 3i.** **(f)** GFP<sup>+</sup> neutrophils ( $2 \times 10^6$  cells/mouse) derived from bone marrow were intravenously infected into *C. albicans* SC5314 ( $2 \times 10^5$  CFU/mouse) infected wild-type mice for 12 hours before scarification at day 4. The absolute count of GFP<sup>+</sup> PMN in the indicated organs (one tibia, 50μl blood, one kidney, one piece of lung, half of spleen, the smallest piece of liver, one brain). **(g)** Gating strategy of Ly-6G<sup>+</sup> neutrophils among CXCL1/2/3<sup>+</sup> cells. Flow cytometry analysis chart of Ly-6G<sup>+</sup> neutrophils in CXCL1/2/3<sup>+</sup> cells in the bone marrow and kidney of *C. albicans* ( $2 \times 10^5$  CFU/mouse)-infected wild-type mice for indicated days, **related to Fig 3j.** Data were presented as mean  $\pm$  SD, n=5**(f)** biological independent samples. Data were analyzed by unpaired two-sided Student's t test in **f**. Source data are provided as a Source Data file.



Supplementary Figure 4

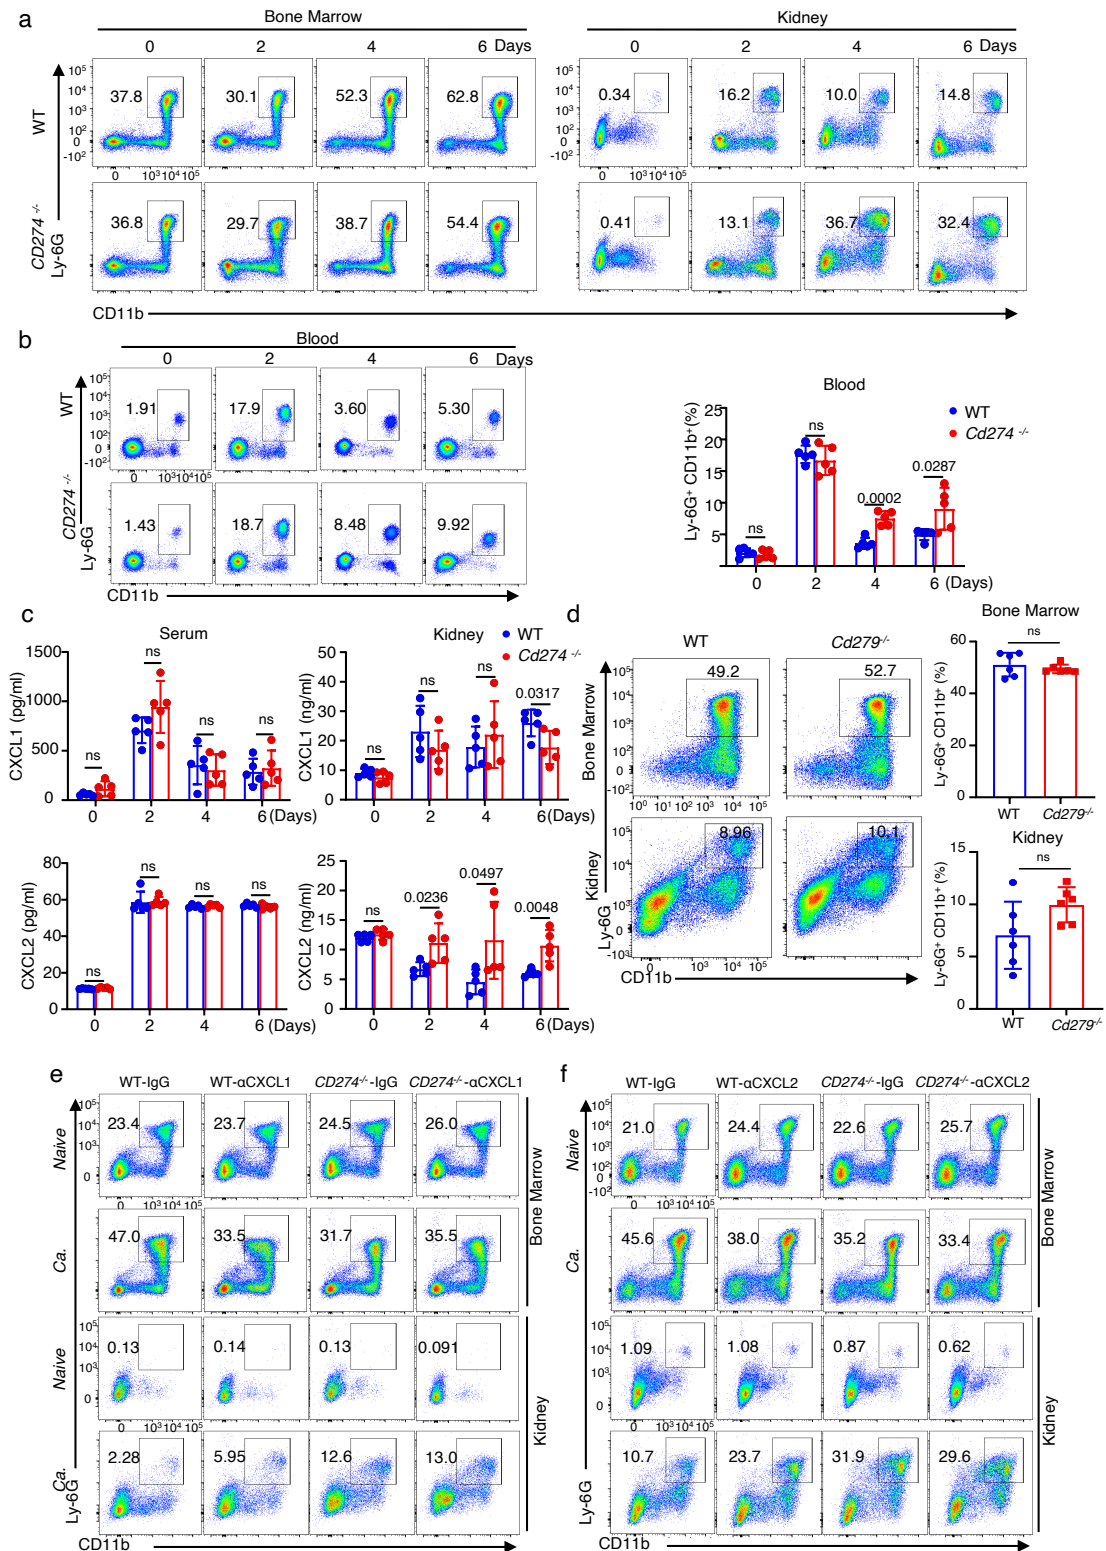

**Supplementary Figure 4. Deficiency of PD-L1 significantly increases survival of *C. albicans*-infected mice through promoting neutrophil migration from bone marrow into kidney. (a) Flow cytometry analysis chart of neutrophils in the bone marrow and kidney of wild-type and *Cd274*<sup>-/-</sup> mice, which were intravenously infection**

with *C. albicans* SC5314 ( $2 \times 10^5$  CFU/mouse) for indicated days, **related to Fig 4b. (b)** The percentage of Ly-6G<sup>+</sup> neutrophils in the blood of wild-type and *Cd274*<sup>-/-</sup> mice, which were intravenously infection with *C. albicans* SC5314 ( $2 \times 10^5$  CFU/mouse) for indicated days. **(c)** ELISA quantification of CXCL1 and CXCL2 in serum and kidney of wild-type and *Cd274*<sup>-/-</sup> mice, which were intravenously infection with *C. albicans* SC5314 ( $2 \times 10^5$  CFU/mouse) for indicated days. **(d)** The percentage of Ly-6G<sup>+</sup> neutrophils in bone marrow and kidney of wild-type and *Cd279*<sup>-/-</sup> mice, which were intravenously infection with *C. albicans* SC5314 ( $2 \times 10^5$  CFU/mouse) for 4 days. **(e-f)** Flow cytometry analysis chart of neutrophils in bone marrow and kidney of naive and *C. albicans* ( $2 \times 10^5$  CFU/mouse)-infected wild-type and *Cd274*<sup>-/-</sup> mice on day 4, which were pretreated with IgG (Control, 5 or 40ng/mouse), anti-CXCL1 (5ng/mouse) and anti-CXCL2 (40ng/mouse) into tibia for 12 hours before scarification, **related to Fig 4f, h respectively**. Data were presented as mean  $\pm$  SD, n=5**(b, c)**, n=6**(d)** biological independent samples. Data were analyzed by unpaired two-sided Student's t test in **b-d**. Source data are provided as a Source Data file.



Supplementary Figure 5

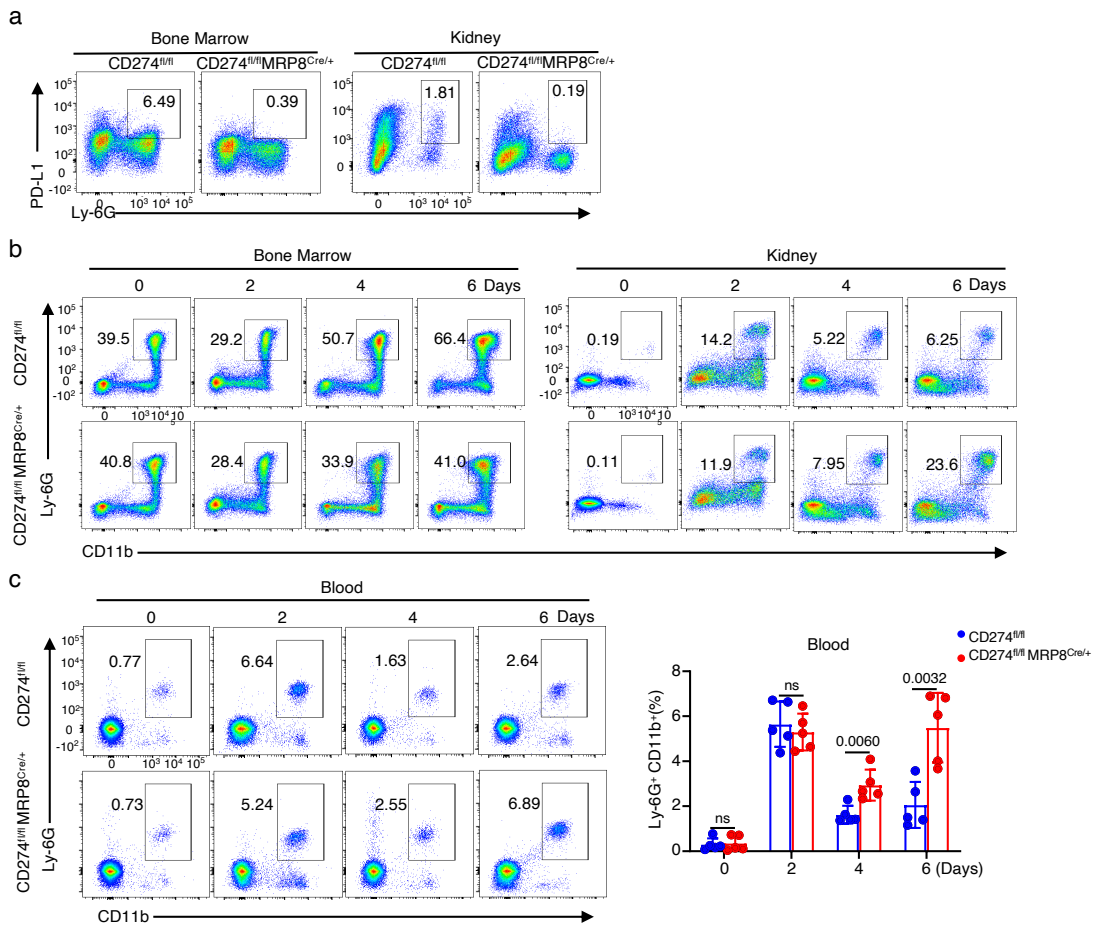

**Supplementary Figure 5. Neutrophil-specific deficiency of PD-L1 facilitates neutrophil migration from the bone marrow into the kidney of *C. albicans*-infected mice.** (a) Flow cytometry analysis chart of PD-L1<sup>+</sup> neutrophils in the bone marrow and kidney of CD274<sup>fl/fl</sup> and CD274<sup>fl/fl</sup>MRP8<sup>Cre/+</sup> mice after infection with *C. albicans* SC5314 (2×10<sup>5</sup> CFU/mouse) on Day 4, **related to Fig 5a**. (b) Flow cytometry analysis chart of neutrophils in the bone marrow and kidney of CD274<sup>fl/fl</sup> and CD274<sup>fl/fl</sup>MRP8<sup>Cre/+</sup> mice, which were intravenously infection with *C. albicans* SC5314 (2×10<sup>5</sup> CFU/mouse) for indicated days, **related to Fig 5c**. (c) The percentage of Ly-6G<sup>+</sup> neutrophils in the blood of CD274<sup>fl/fl</sup> and CD274<sup>fl/fl</sup>MRP8<sup>Cre/+</sup> mice, which were intravenously infection with *C. albicans* SC5314 (2×10<sup>5</sup> CFU/mouse) for indicated days. Data were presented as mean ± SD, n=5(c) biological independent samples. Data were analyzed by unpaired two-sided Student's t test in **c**. Source data are provided as a Source Data file.

Supplementary Figure 6

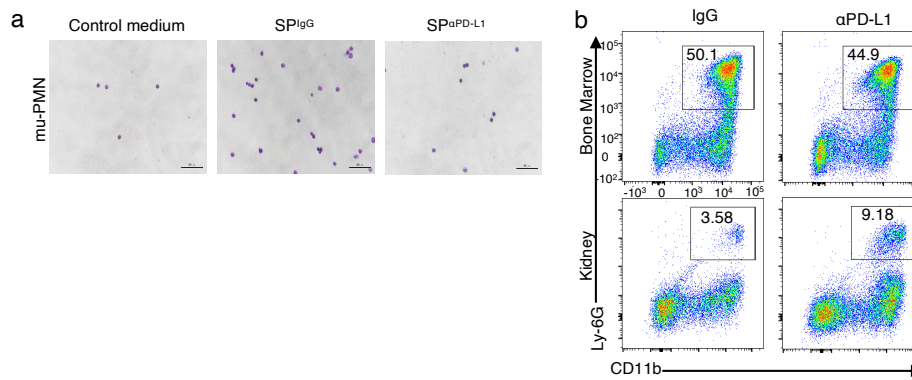

**Supplementary Figure 6. PD-L1 blockade facilitates neutrophil-based immunotherapy against lethal *C. albicans* sepsis. (a)** Representative images of crystal violet staining results show the trans-well data as shown in **Fig 6b** of wild-type mu-PMNs treated with anti-PD-L1 (10µg/ml), which were co-stimulated with curdlan (25µg/well) for 4 hours. **(b)** Flow cytometry analysis chart of neutrophils in the bone marrow of *C. albicans* (SC5314,  $2 \times 10^5$  CFU/mouse)-infected wild-type mice, which were treated by IgG (Control, 200µg/mice) and anti-PD-L1 (200µg/mice) for 4 days, related to **Fig 6c**.

Supplementary Figure 7

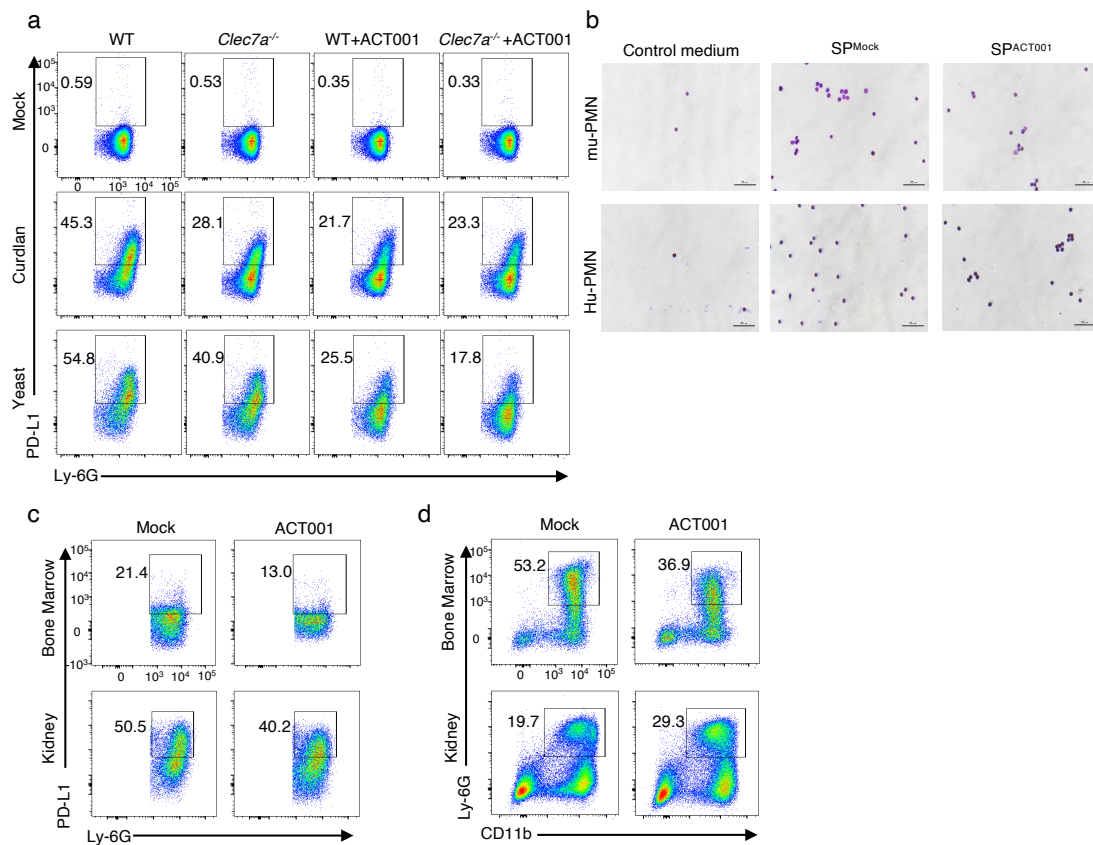

**Supplementary Figure 7. ACT001 inhibits PD-L1 expression to enhance neutrophil-mediated antifungal immunity against lethal *C. albicans* sepsis.** (a) Flow cytometry analysis chart of PD-L1<sup>+</sup> Ly-6G<sup>+</sup> mu-PMNs in wild-type and *Clec7a*<sup>-/-</sup> mouse stimulated with curdlan (25μg/well) or yeast (MOI=1) combined with inhibitor ACT001(40μmol/L) for 12 hours, **related to Fig 7c**. (b) Representative images of crystal violet staining results show the trans-well data as shown in **Fig 7f** of mu-PMNs and Hu-PMNs after treatment with ACT001 (40μmol/L), which were co-stimulated with curdlan (25μg/well for mu-PMNs and 50μg/well for Hu-PMNs) for 4 hours. (c-d) Flow cytometry analysis chart of PD-L1<sup>+</sup> neutrophils (c) and neutrophils (d) in the bone marrow of wild-type mice on day 4, which were intravenously infected with *C. albicans* (SC5314, 2×10<sup>5</sup> CFU/mouse)-infected wild-type mice, which were intragastrically treated with ACT001 (200 mg/kg) on day 1 and 3, **related to Fig 7g, h respectively**.

## Supplemental Tables

**Table S1 Primer sequences of targeted genes**

| Gene    | Sequences (5'-3')                                                |
|---------|------------------------------------------------------------------|
| H-PD-L1 | F: 5'-TGGCATTGCTGAACGCATTT-3'<br>R: 5'-TGCAGCCAGGTCTAATTGTTTT-3' |
| M-PD-L1 | F: 5'-GCTCCAAAGGACTTGTACGTG-3'<br>R: 5'-TGATCTGAAGGGCAGCATTTC-3' |
| M-CXCL1 | F: 5'-CTGGGATTCACCTCAAGAACATC-3'<br>R: 5'-CAGGGTCAAGGCAAGCCTC-3' |
| M-CXCL2 | F: 5'-CCAACCACCAGGCTACAGG-3'<br>R: 5'-GCGTCACACTCAAGCTCTG-3'     |
| H-GAPDH | F: 5'-CTGGAGAAACCTGCCAAGTA-3'<br>R: 5'-TGTTGCTGTAGCCGTATTCA-3'   |
| M-GAPDH | F: 5'-CTCATGACCACAGTCCATGC-3'<br>R: 5'-CACATTGGGGGTAGGAACAC-3'   |
